# Supplementary material for: Room-temperature ferromagnetism evolution in nanostructured titanium nitride superconductors—the influence of structural defects
Source: Royal Society of Chemistry journal article supplement (doi:10.1039/c1jm12359a), 2011-01-01
Supplement: c1jm12359a.pdf [file c1jm12359a.pdf]

## Supporting Information

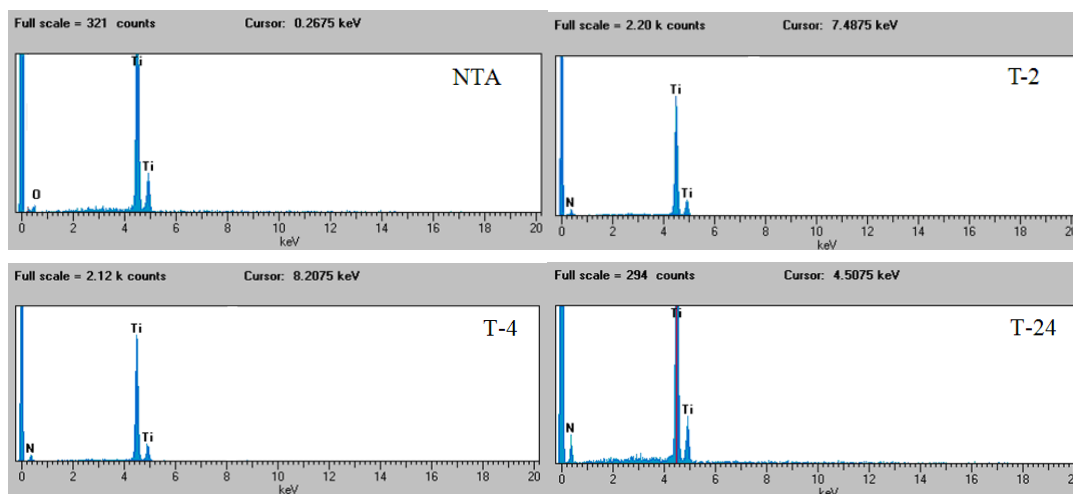

**Figure S1** EDS spectra of NTA, T-2, T-4 and T-24

Figure S1 shows the main constituent elements, determined by EDS, of the products obtained at different  $t_N$ . Only Ti and O are detected by EDS in NTA. When NTA is nitrified for a long enough duration, for example, 2 h, 4 h, and 24 h, only Ti and N elements are detected in resultant nitrified samples T-2, T-4, and T-24.

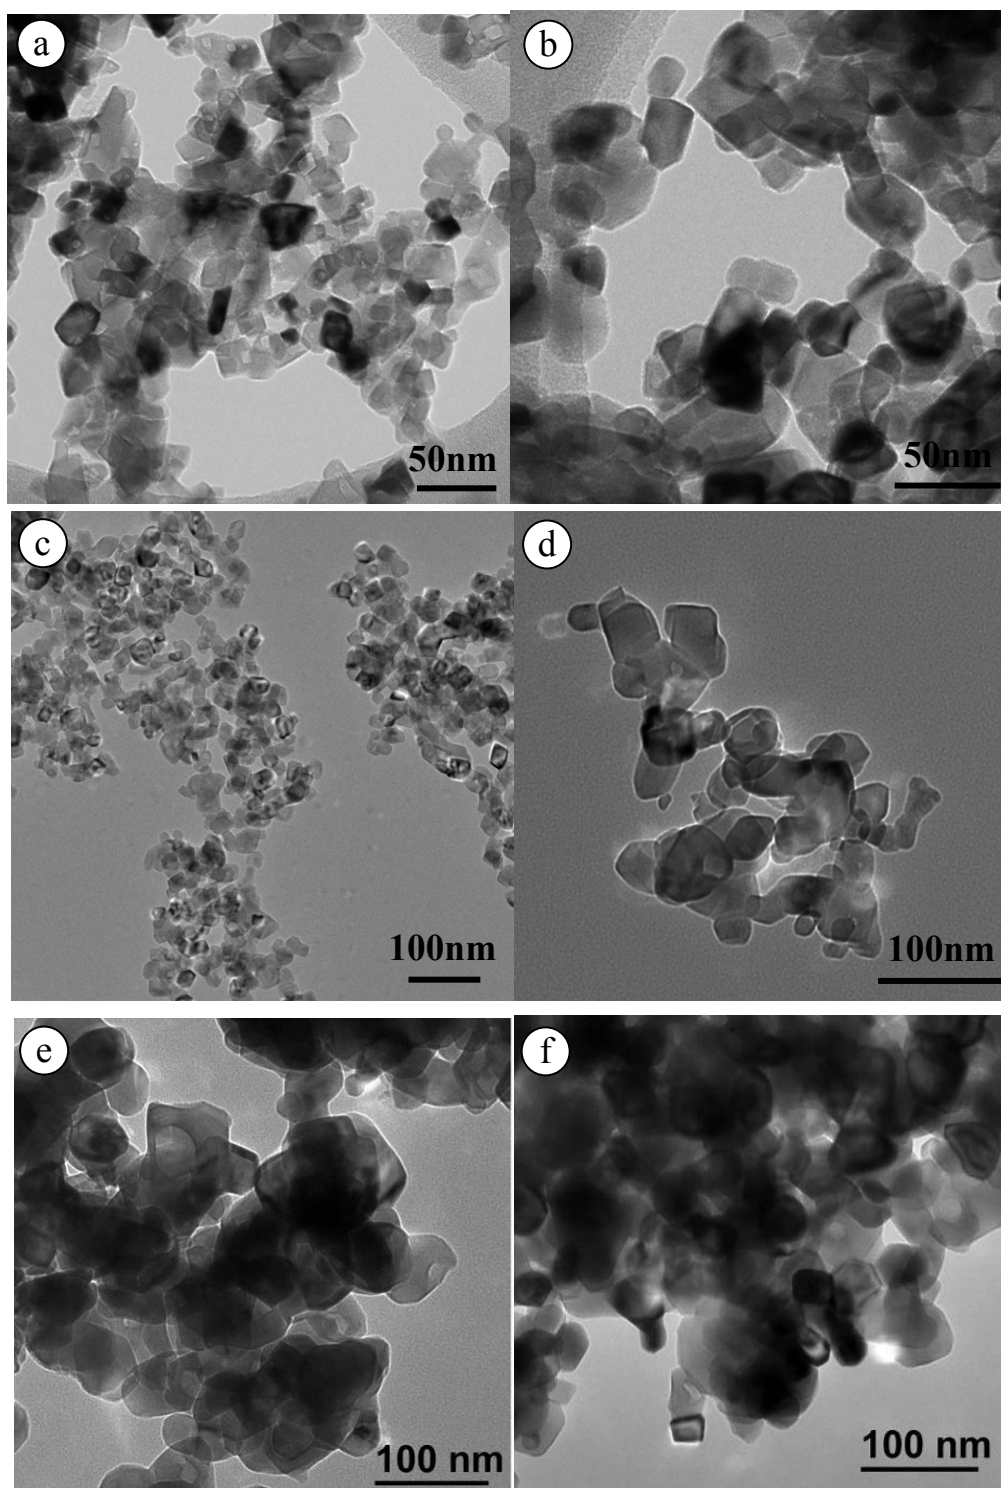

**Figure S2** TEM images of TiN nanocrystals obtained at various  $t_N$ : (a) 2 h; (b) 3 h; (c) 4 h; (d) 8 h; (e) 12 h and (f) 24 h.

Figure S2 shows typical morphological features of as-prepared TiN products obtained at different nitriding time. All the products are nanoparticles and have irregular morphology.

**Table S1.** The content of N of the samples obtained at different  $t_N$

| Sample             | N content (wt.%) |
|--------------------|------------------|
| T-2                | 18.84            |
| T-4                | —                |
| T-8                | 19.92            |
| T-12               | 21.19            |
| T-24               | 21.66            |
| Stoichiometric TiN | 22.63            |

Table S1 shows the contents of N of the samples obtained at different  $t_N$ . It can be seen that extending  $t_N$  leads to more N in samples; and even when  $t_N$  is extended to 24 h, the content of N of sample T-24 is still lower than that of stoichiometric TiN.
